## **Slit-mediated repulsion is a key regulator of motor axon pathfinding in the hindbrain**

Rachel Hammond, Valerie Vivancos, Arifa Naeem, John Chilton, Elvira Mambetisaeva, William Andrews, Vasi Sundaresan and Sarah Guthrie *Development* **132**, 4483-4495.

The name of one of the authors is spelled incorrectly as Mambitisaeva in the printed and on-line versions of this article.

The correct spelling is Mambetisaeva.

The authors apologise for this mistake.
